# Supplementary material for: DNA Methylation Mediates EMT Gene Expression in Human Pancreatic Ductal Adenocarcinoma Cell Lines
Source: MDPI journal article supplement (doi:10.3390/ijms23042117), 2022-02-14
Supplement: s1 [file s1]

**Table S1.** qRT-PCR primers

| Gene            | Orientation | Primer sequence (5' → 3') | Annelation temperature | Product length |
|-----------------|-------------|---------------------------|------------------------|----------------|
| <i>HPRT1</i>    | F           | GGACTAATTATGGACAGGACT     | 60°C                   | 194 bp         |
|                 | R           | GCTCTTCAGTCTGATAAAATCTAC  |                        |                |
| <i>VEGFA</i>    | F           | ATCACGAAGTGGTGAAGTTC      | 60°C                   | 265 bp         |
|                 | R           | TGCTGTAGGAAGCTCATCTC      |                        |                |
| <i>CXCR4</i>    | F           | GGGAACTTCCTATGCAAGGCAGTC  | 59°C                   | 174 bp         |
|                 | R           | GATCCAGACGCCAACATAGACCAC  |                        |                |
| <i>CCL5</i>     | F           | CCTCGCTGTCATCCTCATT       | 54°C                   | 97 bp          |
|                 | R           | GGCAATGTAGGCAAAGCA        |                        |                |
| <i>ZEB2</i>     | F           | TTTCCTGGCCCCATCCCTTT      | 60°C                   | 184 bp         |
|                 | R           | GGTTGATGGGGCTTGTCATTCTT   |                        |                |
| <i>KRT19</i>    | F           | CCGAACCAAGTTTGAGACGG      | 60°C                   | 221 bp         |
|                 | R           | AATCCACCTCCACACTGACC      |                        |                |
| <i>OCN</i>      | F           | ACTCGAAGAAAGATGGACAGGT    | 63°C                   | 152 bp         |
|                 | R           | TCCACATAGTCAGATGGGGGT     |                        |                |
| <i>STEAP1</i>   | F           | TGTCTCTGGGAATTGTGGGA      | 60°C                   | 151 bp         |
|                 | R           | AATGCGTGTATTGTGCCCAG      |                        |                |
| <i>TSPAN13</i>  | F           | TTCGCGTGTTCCAAGAACTG      | 63°C                   | 187 bp         |
|                 | R           | CAGCTCCAATCAGACCCACT      |                        |                |
| <i>CDH2</i>     | F           | GTCAGTGAAGGAGTCAGCAG      | 60°C                   | 150 bp         |
|                 | R           | AGCTCTTGAGGAAAAGGTCC      |                        |                |
| <i>FN1</i>      | F           | ACCAACCTACGGATGACTCG      | 60°C                   | 230 bp         |
|                 | R           | GCTCATCATCTGGCCATTTT      |                        |                |
| <i>ITGA5</i>    | F           | TGCCCCAAAAAGAGCGTCAG      | 63°C                   | 172 bp         |
|                 | R           | TATGGGAGGGAGCGTTTGAAG     |                        |                |
| <i>BMP2</i>     | F           | ACATGCTAGACCTGTATCGCA     | 63°C                   | 235 bp         |
|                 | R           | TGTTCTCGGAAAACCTGAAGC     |                        |                |
| <i>NID2</i>     | F           | TGTACCGAGAGGACACCTCC      | 63°C                   | 197 bp         |
|                 | R           | AGATGCCAAAACCTGCCTGGA     |                        |                |
| <i>SERPINE1</i> | F           | AGCAACTTGCTTGGGAAAGGAGC   | 60°C                   | 205 bp         |
|                 | R           | CGGGCGTGGTGAAGTCAGTATAGTT |                        |                |
| <i>DSC2</i>     | F           | TGTTTACGCTGGTCTGTGGG      | 63°C                   | 178 bp         |
|                 | R           | CCACAAACTCCCTGAGCAGA      |                        |                |

**Table S2.** Pyrosequencing primers

| Gene           | Orientation | Primer sequence (5' → 3')             | Annellation | Product length | CpG sites |
|----------------|-------------|---------------------------------------|-------------|----------------|-----------|
| <i>SNAI1</i>   | F           | GTATTTGTTAGGGGAGTGGT                  | 56°C        | 72 bp          | 6         |
|                | R           | [Btn]-ACCACCCCCCTTTATCAC              |             |                |           |
|                | seq.        | GTTAGGGGAGTGGTTT                      |             |                |           |
| <i>SNAI2</i>   | F           | [Btn]-GTTGGTTTGGTGTGGTGTAG            | 56°C        | 100 bp         | 5         |
|                | R           | CCCTACCCCCCTAACTTCCAAATATAAT          |             |                |           |
|                | seq.        | CCTAACTTCCAAATATAATACAAC              |             |                |           |
| <i>ZEB1</i>    | F           | [Btn]-GTTGAAGTAGGATAATGGGGTTTGGGA     | 56°C        | 150 bp         | 8         |
|                | R           | TTCCCTTAACACAACAACACAAATCAAT          |             |                |           |
|                | seq.        | AGGAGGGTGGGGGAG                       |             |                |           |
| <i>TWIST1</i>  | F           | GAAGGGGAGGGAAGGGG                     | 56°C        | 97 bp          | 3         |
|                | R           | [Btn]-TAACAATTCCTCCTCCCA              |             |                |           |
|                | seq.        | GGGAGGGAAGGGGGAG                      |             |                |           |
| <i>CDH1</i>    | F           | ATTTTAGTAATTTTAGGTTAGAGGGTTA          | 52°C        | 106 bp         | 7         |
|                | R           | [Btn]-ACCACAACCAATCAACAAC             |             |                |           |
|                | seq.        | ACCACAACCAATCAACAAC                   |             |                |           |
| <i>KRT19</i>   | F           | ATTGGAGATAGTTGTAGGAAGTTATG            | 56°C        | 70 bp          | 4         |
|                | R           | [Btn]-AATCCCAACTTCTAAAACCAAAATTACTC   |             |                |           |
|                | seq.        | AGTTGTAGGAAGTTATGG                    |             |                |           |
| <i>OCN</i>     | F           | [Btn]-TAGGGTGTGGGAAGTAGGAT            | 56°C        | 75 bp          | 4         |
|                | R           | CCTCCTCCCTCCATAACCAATTCACCTAAA        |             |                |           |
|                | seq.        | ACCAATTCACCTAAAATC                    |             |                |           |
| <i>STEAP1</i>  | F           | AGAGTGGGTGAGTTTTTTGAAT                | 56°C        | 106 bp         | 2         |
|                | R           | [Btn]-CTACACCCTCCCAAACTA              |             |                |           |
|                | seq.        | GTGTTTTGTGAAGGTTGG                    |             |                |           |
| <i>TSPAN13</i> | F           | GGGTTAGGTTTTAAAGGTAAGGATAAAG          | 56°C        | 103 bp         | 5         |
|                | R           | [Btn] CCCCCCAAACCATCTTAAAACCTATAATT   |             |                |           |
|                | seq.        | AGTAGTTGTTAGGGAATT                    |             |                |           |
| <i>CDH2</i>    | F           | TAGATTGGGATAAAGATAATAGGATAGTAG        | 56 °C       | 95 bp          | 3         |
|                | R           | [Btn]-CTTAATTACCAAACCTTACCTCCACCTTACC |             |                |           |
|                | seq.        | GGATAGTAGAGTTTTTGTAG                  |             |                |           |
| <i>FN1</i>     | F           | AGGGTTTTATTTTGTAGGTAGTTT              | 56 °C       | 93 bp          | 4         |
|                | R           | [Btn]-ACAAATAATTCAACCCCAATCC          |             |                |           |
|                | seq.        | TGAGGTAGTTTGTTTTAGT                   |             |                |           |
| <i>ITGA5</i>   | F           | TTGGGTTTTTGAATTTTGAGT                 | 56°C        | 106 bp         | 4         |
|                | R           | [Btn]-CCAAACAACCCACTTCCAATAAACT       |             |                |           |
|                | seq.        | GGTTTTTGAATTTTGAGTT                   |             |                |           |
| <i>BMP2</i>    | F           | GGGGAAATAAGAGGTAGATTTTGAT             | 56°C        | 84 bp          | 6         |
|                | R           | [Btn]-CCTCCACTCCCTACTCTCA             |             |                |           |
|                | seq.        | GATTTTGTATTTGTTTGGAT                  |             |                |           |
| <i>NID2</i>    | F           | GTTTGGGGAGTAGGATGAGGTA                | 56°C        | 80 bp          | 4         |
|                | R           | [Btn]-CAAAAAATCAAAATCTTCCCATCCC       |             |                |           |
|                | seq.        | GGAGTAGGATGAGGTAT                     |             |                |           |
| <i>DSC2</i>    | F           | [Btn]-AGGGTGTAGTAGGAGTAGT             | 56°C        | 81 bp          | 4         |
|                | R           | CCTACCCCCAACCCTCTCCATA                |             |                |           |
|                | seq.        | ACCCTCTCCATAAAAAAC                    |             |                |           |

**Table S3.** Gene expression changes after 2 days of exposure

| Condition         |                 | CM    |      |         | HY     |      |         | CM+HY  |       |         |
|-------------------|-----------------|-------|------|---------|--------|------|---------|--------|-------|---------|
| Cell line         | Gene            | FC    | SEM  | p-value | FC     | SEM  | p-value | FC     | SEM   | p-value |
| <b>BxPC-3</b>     | <i>CCL5</i>     | 0.74  | 0.03 | 1.000   | 0.54   | 0.02 | 0.247   | 0.45   | 0.00  | 0.013   |
|                   | <i>CXCR4</i>    | 2.20  | 0.21 | 1.000   | 118.50 | 2.87 | <0.001  | 162.71 | 10.40 | <0.001  |
|                   | <i>VEGFA</i>    | 1.76  | 0.09 | 0.002   | 5.41   | 0.86 | 0.083   | 4.38   | 0.27  | <0.001  |
|                   | <i>SNAI1</i>    | 1.60  | 0.14 | 0.006   | 0.70   | 0.17 | 0.766   | 2.44   | 0.02  | <0.001  |
|                   | <i>SNAI2</i>    | 2.05  | 0.11 | <0.001  | 1.19   | 0.27 | 0.993   | 0.70   | 0.02  | <0.001  |
|                   | <i>ZEB1</i>     | 1.54  | 0.10 | 0.186   | 0.51   | 0.00 | 0.003   | 1.68   | 0.02  | 0.006   |
|                   | <i>ZEB2</i>     | #     |      |         | #      |      |         | #      |       |         |
|                   | <i>TWIST1</i>   | #     |      |         | #      |      |         | #      |       |         |
|                   | <i>CDH1</i>     | 1.45  | 0.08 | 0.273   | 0.46   | 0.22 | 0.131   | 0.70   | 0.08  | 0.735   |
|                   | <i>KRT19</i>    | 1.13  | 0.13 | 0.944   | 2.35   | 0.14 | 0.003   | 1.50   | 0.07  | 0.003   |
|                   | <i>OCN</i>      | 1.05  | 0.09 | 1.000   | 0.48   | 0.03 | <0.001  | 0.41   | 0.03  | <0.001  |
|                   | <i>STEAP1</i>   | 1.17  | 0.07 | 0.349   | 0.54   | 0.04 | <0.001  | 0.69   | 0.11  | 0.232   |
|                   | <i>TSPAN13</i>  | 0.85  | 0.02 | 0.002   | 1.08   | 0.03 | 0.365   | 1.03   | 0.15  | 1.000   |
|                   | <i>CDH2</i>     | 0.60  | 0.03 | <0.001  | 1.51   | 0.05 | <0.001  | 0.72   | 0.06  | 0.002   |
|                   | <i>FN1</i>      | 0.72  | 0.03 | 0.003   | 7.20   | 0.20 | <0.001  | 4.56   | 0.34  | 0.009   |
|                   | <i>ITGA5</i>    | 1.53  | 0.05 | 1.000   | 9.80   | 0.32 | <0.001  | 11.55  | 0.91  | <0.001  |
|                   | <i>BMP2</i>     | 0.87  | 0.06 | 0.406   | 2.86   | 0.28 | 0.016   | 2.69   | 0.05  | <0.001  |
|                   | <i>NID2</i>     | 1.53  | 0.33 | 0.762   | 1.23   | 0.03 | 0.288   | 0.69   | 0.05  | 0.042   |
|                   | <i>SERPINE1</i> | 2.55  | 0.21 | 0.011   | 3.11   | 0.09 | 0.009   | 5.21   | 0.53  | 0.025   |
|                   | <i>DSC2</i>     | 1.13  | 0.04 | 1.000   | 2.56   | 0.37 | 0.007   | 3.90   | 0.52  | <0.001  |
| <b>MIA PaCa-2</b> | <i>CCL5</i>     | 3.96  | 0.21 | <0.001  | 2.35   | 0.40 | 0.155   | 2.15   | 0.06  | 0.002   |
|                   | <i>CXCR4</i>    | 1.43  | 0.36 | 1.000   | 38.3   | 1.62 | <0.001  | 20.69  | 0.83  | <0.001  |
|                   | <i>VEGFA</i>    | 2.58  | 0.54 | 0.236   | 1.05   | 0.23 | 1.000   | 1.21   | 0.24  | 0.967   |
|                   | <i>SNAI1</i>    | 0.26  | 0.05 | <0.001  | 0.11   | 0.01 | <0.001  | 0.51   | 0.16  | 0.232   |
|                   | <i>SNAI2</i>    | #     |      |         | #      |      |         | #      |       |         |
|                   | <i>ZEB1</i>     | 3.34  | 0.00 | <0.001  | 0.39   | 0.04 | 0.001   | 0.67   | 0.10  | 0.038   |
|                   | <i>ZEB2</i>     | #     |      |         | #      |      |         | #      |       |         |
|                   | <i>TWIST1</i>   | #     |      |         | #      |      |         | #      |       |         |
|                   | <i>CDH1</i>     | #     |      |         | #      |      |         | #      |       |         |
|                   | <i>KRT19</i>    | 1.38  | 0.11 | 0.151   | 1.33   | 0.13 | 0.327   | 1.64   | 0.13  | 0.004   |
|                   | <i>OCN</i>      | 3.57  | 0.21 | 0.004   | 1.16   | 0.05 | 0.282   | 0.09   | 0.00  | <0.001  |
|                   | <i>STEAP1</i>   | #     |      |         | #      |      |         | #      |       |         |
|                   | <i>TSPAN13</i>  | 0.58  | 0.04 | 0.003   | 1.08   | 0.05 | 1.000   | 0.40   | 0.14  | <0.001  |
|                   | <i>CDH2</i>     | #     |      |         | #      |      |         | #      |       |         |
|                   | <i>FN1</i>      | 1.17  | 0.23 | 0.986   | 1.67   | 0.09 | 0.004   | 1.89   | 0.18  | 0.035   |
|                   | <i>ITGA5</i>    | 0.95  | 0.03 | 1.000   | 0.46   | 0.02 | <0.001  | 0.36   | 0.14  | <0.001  |
|                   | <i>BMP2</i>     | #     |      |         | #      |      |         | #      |       |         |
|                   | <i>NID2</i>     | #     |      |         | #      |      |         | #      |       |         |
|                   | <i>SERPINE1</i> | 10.39 | 0.37 | <0.001  | 0.78   | 0.06 | 0.061   | 1.84   | 0.16  | 0.016   |
|                   | <i>DSC2</i>     | #     |      |         | #      |      |         | #      |       |         |
| <b>PANC-1</b>     | <i>CCL5</i>     | 1.60  | 0.15 | 0.008   | 1.19   | 0.07 | 1.000   | 1.21   | 0.11  | 1.000   |
|                   | <i>CXCR4</i>    | 0.66  | 0.22 | 1.000   | 12.78  | 0.98 | <0.001  | 8.88   | 1.34  | <0.001  |
|                   | <i>VEGFA</i>    | 1.04  | 0.11 | 1.000   | 1.04   | 0.07 | 0.997   | 1.02   | 0.05  | 1.000   |
|                   | <i>SNAI1</i>    | 0.81  | 0.01 | 0.020   | 0.49   | 0.15 | 0.155   | 0.40   | 0.12  | 0.067   |
|                   | <i>SNAI2</i>    | 1.55  | 0.06 | <0.001  | 1.07   | 0.05 | 0.926   | 0.78   | 0.13  | 0.598   |
|                   | <i>ZEB1</i>     | 1.58  | 0.37 | 0.772   | 0.94   | 0.11 | 0.998   | 0.99   | 0.07  | 1.000   |
|                   | <i>ZEB2</i>     | #     |      |         | #      |      |         | #      |       |         |

|                 |                 |      |      |        |      |      |        |       |      |        |
|-----------------|-----------------|------|------|--------|------|------|--------|-------|------|--------|
|                 | <i>TWIST1</i>   | #    |      |        | #    |      |        | #     |      |        |
|                 | <i>CDH1</i>     | #    |      |        | #    |      |        | #     |      |        |
|                 | <i>KRT19</i>    | 0.92 | 0.12 | 0.990  | 0.74 | 0.05 | 0.008  | 0.67  | 0.03 | <0.001 |
|                 | <i>OCLN</i>     | 1.85 | 0.26 | 0.002  | 0.96 | 0.07 | 1.000  | 0.86  | 0.04 | 1.000  |
|                 | <i>STEAP1</i>   | #    |      |        | #    |      |        | #     |      |        |
|                 | <i>TSPAN13</i>  | 0.83 | 0.07 | 0.340  | 1.17 | 0.17 | 0.939  | 0.96  | 0.06 | 0.991  |
|                 | <i>CDH2</i>     | #    |      |        | #    |      |        | #     |      |        |
|                 | <i>FN1</i>      | 1.14 | 0.10 | 1.000  | 1.20 | 0.10 | 1.000  | 1.00  | 0.07 | 1.000  |
|                 | <i>ITGA5</i>    | 1.03 | 0.12 | 1.000  | 1.01 | 0.15 | 1.000  | 0.95  | 0.13 | 0.999  |
|                 | <i>BMP2</i>     | #    |      |        | #    |      |        | #     |      |        |
|                 | <i>NID2</i>     | #    |      |        | #    |      |        | #     |      |        |
|                 | <i>SERPINE1</i> | 1.79 | 0.34 | 0.040  | 1.58 | 0.12 | 0.228  | 1.53  | 0.05 | 0.337  |
|                 | <i>DSC2</i>     | 1.50 | 0.27 | 0.696  | 5.60 | 0.47 | <0.001 | 4.04  | 0.19 | <0.001 |
| <b>SU.86.86</b> | <i>CCL5</i>     | 1.43 | 0.52 | 0.008  | 3.13 | 0.49 | <0.001 | 3.08  | 0.85 | 0.003  |
|                 | <i>CXCR4</i>    | 1.00 | 0.19 | 1.000  | 5.56 | 0.24 | <0.001 | 7.22  | 0.61 | <0.001 |
|                 | <i>VEGFA</i>    | 8.13 | 0.06 | <0.001 | 3.82 | 0.36 | 0.003  | 5.80  | 0.25 | <0.001 |
|                 | <i>SNAI1</i>    | 1.18 | 0.09 | 1.000  | 1.49 | 0.23 | 0.149  | 2.93  | 0.12 | <0.001 |
|                 | <i>SNAI2</i>    | 1.64 | 0.17 | 0.001  | 0.40 | 0.10 | 0.001  | 0.42  | 0.02 | 0.002  |
|                 | <i>ZEB1</i>     | 2.13 | 0.14 | <0.001 | 0.59 | 0.10 | 0.019  | 0.67  | 0.02 | <0.001 |
|                 | <i>ZEB2</i>     | #    |      |        | #    |      |        | #     |      |        |
|                 | <i>TWIST1</i>   | #    |      |        | #    |      |        | #     |      |        |
|                 | <i>CDH1</i>     | 1.05 | 0.08 | 1.000  | 2.52 | 0.14 | <0.001 | 1.32  | 0.41 | 1.000  |
|                 | <i>KRT19</i>    | 1.39 | 0.28 | 0.840  | 0.78 | 0.18 | 0.867  | 0.89  | 0.14 | 0.979  |
|                 | <i>OCLN</i>     | 1.46 | 0.11 | 0.070  | 0.50 | 0.04 | <0.001 | 0.95  | 0.22 | 1.000  |
|                 | <i>STEAP1</i>   | 1.68 | 0.17 | <0.001 | 0.36 | 0.10 | <0.001 | 0.38  | 0.08 | <0.001 |
|                 | <i>TSPAN13</i>  | 1.12 | 0.11 | 1.000  | 0.74 | 0.14 | 0.694  | 0.74  | 0.16 | 0.851  |
|                 | <i>CDH2</i>     | 2.04 | 0.22 | 0.055  | 1.05 | 0.04 | 0.864  | 1.43  | 0.13 | 0.151  |
|                 | <i>FN1</i>      | 1.81 | 0.14 | 0.009  | 8.73 | 0.26 | <0.001 | 19.14 | 1.21 | <0.001 |
|                 | <i>ITGA5</i>    | 1.66 | 0.04 | 1.000  | 8.37 | 0.30 | <0.001 | 13.34 | 0.61 | <0.001 |
|                 | <i>BMP2</i>     | 1.25 | 0.12 | 1.000  | 7.09 | 0.51 | <0.001 | 9.13  | 0.37 | <0.001 |
|                 | <i>NID2</i>     | 1.17 | 0.13 | 0.829  | 0.43 | 0.06 | <0.001 | 1.30  | 0.30 | 0.948  |
|                 | <i>SERPINE1</i> | 3.01 | 0.35 | 0.054  | 4.89 | 0.75 | <0.001 | 5.80  | 0.34 | <0.001 |
|                 | <i>DSC2</i>     | 1.42 | 0.07 | <0.001 | 0.80 | 0.04 | 0.065  | 1.11  | 0.08 | 1.000  |

# Unexpressed in Controls (DMEM under normoxic conditions); CM, conditioned media in normoxia; HY, DMEM in hypoxia; CM+HY, CM in hypoxia

**Table S4.** Gene expression changes after 6 days of exposure

| Condition         |                 | CM   |      |         | HY   |      |         | CM+HY |      |         |
|-------------------|-----------------|------|------|---------|------|------|---------|-------|------|---------|
| Cell line         | Gene            | FC   | SEM  | p-value | FC   | SEM  | p-value | FC    | SEM  | p-value |
| <b>BxPC-3</b>     | <i>CCL5</i>     | 0.81 | 0.19 | 0.825   | 1.26 | 0.08 | 0.790   | 1.07  | 0.08 | 1.000   |
|                   | <i>CXCR4</i>    | 0.87 | 0.07 | 1.000   | 4.65 | 0.19 | <0.001  | 10.39 | 0.86 | <0.001  |
|                   | <i>VEGFA</i>    | 1.21 | 0.03 | 0.282   | 1.90 | 0.12 | 0.038   | 2.30  | 0.11 | <0.001  |
|                   | <i>SNAI1</i>    | 1.00 | 0.26 | 0.991   | 0.90 | 0.14 | 0.980   | 1.00  | 0.07 | 1.000   |
|                   | <i>SNAI2</i>    | 0.69 | 0.18 | 0.504   | 1.46 | 0.07 | 0.002   | 1.69  | 0.12 | 0.002   |
|                   | <i>ZEB1</i>     | #    |      |         | #    |      |         | #     |      |         |
|                   | <i>ZEB2</i>     | 1.76 | 0.42 | 1.000   | 2.62 | 0.48 | 0.314   | 3.73  | 0.73 | 0.043   |
|                   | <i>TWIST1</i>   | #    |      |         | #    |      |         | #     |      |         |
|                   | <i>CDH1</i>     | 0.54 | 0.03 | 0.008   | 0.72 | 0.07 | 0.424   | 0.41  | 0.00 | <0.001  |
|                   | <i>KRT19</i>    | 1.03 | 0.16 | 1.000   | 1.04 | 0.05 | 0.999   | 1.03  | 0.07 | 1.000   |
|                   | <i>OCLN</i>     | 0.72 | 0.08 | 0.367   | 0.35 | 0.01 | 0.005   | 0.16  | 0.01 | <0.001  |
|                   | <i>STEAP1</i>   | 1.33 | 0.11 | 0.124   | 0.85 | 0.07 | 0.602   | 1.43  | 0.08 | 0.015   |
|                   | <i>TSPAN13</i>  | 0.85 | 0.03 | 0.246   | 0.61 | 0.05 | <0.001  | 0.51  | 0.02 | <0.001  |
|                   | <i>CDH2</i>     | 0.64 | 0.03 | <0.001  | 0.95 | 0.05 | 1.000   | 0.34  | 0.02 | <0.001  |
|                   | <i>FN1</i>      | 0.69 | 0.10 | 0.201   | 3.79 | 0.20 | <0.001  | 4.14  | 0.09 | <0.001  |
|                   | <i>ITGA5</i>    | 0.94 | 0.08 | 0.989   | 4.64 | 0.13 | 0.004   | 8.21  | 0.31 | 0.001   |
|                   | <i>BMP2</i>     | 0.69 | 0.06 | 0.013   | 1.92 | 0.18 | <0.001  | 1.90  | 0.08 | <0.001  |
|                   | <i>NID2</i>     | 0.65 | 0.21 | 0.780   | 0.99 | 0.04 | 1.000   | 0.42  | 0.05 | 0.318   |
|                   | <i>SERPINE1</i> | 2.22 | 0.15 | <0.001  | 1.34 | 0.04 | 0.006   | 2.55  | 0.09 | <0.001  |
|                   | <i>DSC2</i>     | 0.96 | 0.18 | 0.999   | 1.31 | 0.22 | 0.990   | 1.28  | 0.12 | 0.955   |
|                   | <i>DNMT1</i>    | 0.77 | 0.04 | 0.037   | 0.60 | 0.04 | <0.001  | 0.40  | 0.01 | <0.001  |
|                   | <i>DNMT3A</i>   | 1.22 | 0.11 | 0.507   | 1.00 | 0.06 | 1.000   | 0.92  | 0.02 | 1.000   |
|                   | <i>DNMT3B</i>   | 0.80 | 0.04 | 0.037   | 0.48 | 0.02 | <0.001  | 0.32  | 0.01 | 0.018   |
|                   | <i>TET1</i>     | #    |      |         | #    |      |         | #     |      |         |
| <b>MIA PaCa-2</b> | <i>CCL5</i>     | 7.07 | 0.45 | 0.023   | 0.33 | 0.03 | 0.999   | 2.95  | 0.22 | 0.091   |
|                   | <i>CXCR4</i>    | 6.72 | 0.54 | <0.001  | 7.31 | 0.76 | <0.001  | 24.36 | 1.18 | <0.001  |
|                   | <i>VEGFA</i>    | 1.44 | 0.53 | 1.000   | 1.89 | 0.46 | 1.000   | 2.56  | 0.62 | 0.617   |
|                   | <i>SNAI1</i>    | 1.34 | 0.02 | 0.305   | 0.81 | 0.02 | 0.555   | 0.95  | 0.04 | 0.998   |
|                   | <i>SNAI2</i>    | #    |      |         | #    |      |         | #     |      |         |
|                   | <i>ZEB1</i>     | 0.75 | 0.02 | 0.830   | 0.52 | 0.03 | 0.393   | 1.01  | 0.01 | 1.000   |
|                   | <i>ZEB2</i>     | #    |      |         | #    |      |         | #     |      |         |
|                   | <i>TWIST1</i>   | #    |      |         | #    |      |         | #     |      |         |
|                   | <i>CDH1</i>     | #    |      |         | #    |      |         | #     |      |         |
|                   | <i>KRT19</i>    | 1.49 | 0.10 | 0.104   | 1.03 | 0.03 | 1.000   | 1.48  | 0.08 | 0.097   |
|                   | <i>OCLN</i>     | 1.37 | 0.09 | 0.197   | 0.76 | 0.07 | 0.257   | 1.06  | 0.09 | 1.000   |
|                   | <i>STEAP1</i>   | #    |      |         | #    |      |         | #     |      |         |
|                   | <i>TSPAN13</i>  | 1.21 | 0.12 | 1.000   | 0.65 | 0.05 | 0.169   | 0.72  | 0.08 | 0.328   |
|                   | <i>CDH2</i>     | #    |      |         | #    |      |         | #     |      |         |
|                   | <i>FN1</i>      | 1.1  | 0.13 | 1.000   | 0.99 | 0.04 | 1.000   | 1.63  | 0.18 | 0.017   |
|                   | <i>ITGA5</i>    | 1.9  | 0.25 | 1.000   | 0.96 | 0.15 | 0.235   | 1.8   | 0.19 | 1.000   |
|                   | <i>BMP2</i>     | #    |      |         | #    |      |         | #     |      |         |
|                   | <i>NID2</i>     | #    |      |         | #    |      |         | #     |      |         |
|                   | <i>SERPINE1</i> | 2.76 | 0.15 | <0.001  | 1.14 | 0.04 | 0.287   | 4.15  | 0.21 | <0.001  |
|                   | <i>DSC2</i>     | #    |      |         | #    |      |         | #     |      |         |
|                   | <i>DNMT1</i>    | 0.74 | 0.03 | 1.000   | 0.54 | 0.01 | 1.000   | 0.56  | 0.02 | 1.000   |
|                   | <i>DNMT3A</i>   | 0.96 | 0.03 | 1.000   | 0.49 | 0.02 | 0.013   | 0.65  | 0.10 | 0.421   |
|                   | <i>DNMT3B</i>   | 1.01 | 0.03 | 1.000   | 0.51 | 0.03 | <0.001  | 0.51  | 0.04 | <0.001  |

|                 |                 |      |      |       |       |      |        |       |      |        |
|-----------------|-----------------|------|------|-------|-------|------|--------|-------|------|--------|
|                 | <i>TET1</i>     | 1.96 | 0.24 | 0.011 | 1.01  | 0.22 | 0.995  | 3.11  | 0.27 | <0.001 |
| <b>PANC-1</b>   | <i>CCL5</i>     | 2.48 | 0.40 | 0.184 | 0.71  | 0.14 | 0.812  | 1.14  | 0.11 | 1.000  |
|                 | <i>CXCR4</i>    | 2.26 | 0.47 | 1.000 | 10.74 | 0.66 | <0.001 | 25.61 | 1.99 | <0.001 |
|                 | <i>VEGFA</i>    | 0.96 | 0.25 | 0.991 | 2.46  | 0.16 | 0.001  | 2.00  | 0.07 | 0.007  |
|                 | <i>SNAI1</i>    | 0.98 | 0.02 | 1.000 | 0.77  | 0.05 | 0.685  | 0.12  | 0.01 | <0.001 |
|                 | <i>SNAI2</i>    | 0.50 | 0.04 | 0.073 | 1.47  | 0.09 | 0.955  | 0.75  | 0.09 | 1.000  |
|                 | <i>ZEB1</i>     | 1.35 | 0.06 | 0.037 | 0.85  | 0.05 | 0.401  | 0.73  | 0.02 | 0.026  |
|                 | <i>ZEB2</i>     | #    |      |       | #     |      |        | #     |      |        |
|                 | <i>TWIST1</i>   | #    |      |       | #     |      |        | #     |      |        |
|                 | <i>CDH1</i>     | #    |      |       | #     |      |        | #     |      |        |
|                 | <i>KRT19</i>    | 1.15 | 0.27 | 1.000 | 1.02  | 0.03 | 1.000  | 1.13  | 0.09 | 0.980  |
|                 | <i>OCLN</i>     | 1.03 | 0.26 | 1.000 | 0.96  | 0.25 | 0.994  | 0.96  | 0.12 | 1.000  |
|                 | <i>STEAP1</i>   | #    |      |       | #     |      |        | #     |      |        |
|                 | <i>TSPAN13</i>  | 0.75 | 0.05 | 0.022 | 0.97  | 0.09 | 1.000  | 0.98  | 0.05 | 1.000  |
|                 | <i>CDH2</i>     | #    |      |       | #     |      |        | #     |      |        |
|                 | <i>FN1</i>      | 0.61 | 0.13 | 0.430 | 2.02  | 0.17 | 0.002  | 1.03  | 0.05 | 1.000  |
|                 | <i>ITGA5</i>    | 1.11 | 0.30 | 1.000 | 0.88  | 0.24 | 0.965  | 1.32  | 0.02 | 0.745  |
|                 | <i>BMP2</i>     | #    |      |       | #     |      |        | #     |      |        |
|                 | <i>NID2</i>     | #    |      |       | #     |      |        | #     |      |        |
|                 | <i>SERPINE1</i> | 0.97 | 0.06 | 1.000 | 0.67  | 0.05 | 0.015  | 0.83  | 0.07 | 0.234  |
|                 | <i>DSC2</i>     | 1.51 | 0.33 | 0.899 | 2.05  | 0.27 | 0.294  | 5.76  | 0.27 | 0.006  |
|                 | <i>DNMT1</i>    | 0.74 | 0.08 | 0.556 | 0.44  | 0.02 | 0.006  | 0.29  | 0.16 | 0.039  |
|                 | <i>DNMT3A</i>   | 0.52 | 0.03 | 0.110 | 0.34  | 0.03 | 0.013  | 0.45  | 0.02 | 0.057  |
|                 | <i>DNMT3B</i>   | 0.85 | 0.14 | 0.893 | 0.25  | 0.07 | 0.022  | 0.21  | 0.09 | 0.013  |
|                 | <i>TET1</i>     | 1.46 | 0.09 | 0.007 | 1.26  | 0.09 | 0.140  | 0.41  | 0.02 | <0.001 |
| <b>SU.86.86</b> | <i>CCL5</i>     | 0.75 | 0.02 | 0.024 | 1.47  | 0.13 | 0.006  | 1.60  | 0.12 | <0.001 |
|                 | <i>CXCR4</i>    | 1.68 | 0.21 | 0.102 | 6.03  | 1.37 | 0.004  | 7.95  | 0.86 | <0.001 |
|                 | <i>VEGFA</i>    | 2.81 | 0.50 | 0.015 | 6.07  | 1.03 | 0.037  | 18.91 | 0.66 | <0.001 |
|                 | <i>SNAI1</i>    | 1.67 | 0.10 | 0.642 | 0.34  | 0.09 | 0.021  | 2.34  | 0.06 | 0.084  |
|                 | <i>SNAI2</i>    | 0.69 | 0.13 | 0.397 | 2.65  | 0.21 | 0.001  | 2.32  | 0.15 | 0.004  |
|                 | <i>ZEB1</i>     | #    |      |       | #     |      |        | #     |      |        |
|                 | <i>ZEB2</i>     | 1.02 | 0.19 | 1.000 | 0.86  | 0.07 | 1.000  | 1.77  | 0.17 | 0.069  |
|                 | <i>TWIST1</i>   | #    |      |       | #     |      |        | #     |      |        |
|                 | <i>CDH1</i>     | 0.92 | 0.03 | 0.996 | 1.15  | 0.21 | 1.000  | 1.19  | 0.05 | 0.925  |
|                 | <i>KRT19</i>    | 0.93 | 0.08 | 1.000 | 1.32  | 0.17 | 0.536  | 1.77  | 0.10 | 0.003  |
|                 | <i>OCLN</i>     | 1.28 | 0.15 | 0.067 | 1.52  | 0.10 | 0.704  | 1.57  | 0.11 | 0.080  |
|                 | <i>STEAP1</i>   | 1.32 | 0.30 | 1.000 | 0.52  | 0.09 | 0.352  | 0.88  | 0.20 | 0.990  |
|                 | <i>TSPAN13</i>  | 0.94 | 0.16 | 1.000 | 0.38  | 0.03 | 0.087  | 0.50  | 0.12 | 0.331  |
|                 | <i>CDH2</i>     | 1.22 | 0.10 | 0.425 | 0.64  | 0.20 | 1.000  | 1.47  | 0.10 | 0.013  |
|                 | <i>FN1</i>      | 1.50 | 0.06 | 0.032 | 11.11 | 1.41 | <0.001 | 10.84 | 0.45 | <0.001 |
|                 | <i>ITGA5</i>    | 1.50 | 0.28 | 1.000 | 4.13  | 1.31 | 0.266  | 17.70 | 0.98 | 0.003  |
|                 | <i>BMP2</i>     | 1.47 | 0.07 | 0.614 | 1.60  | 0.25 | 0.449  | 3.34  | 0.05 | 0.006  |
|                 | <i>NID2</i>     | 1.94 | 0.20 | 0.007 | 0.73  | 0.05 | 0.920  | 2.58  | 0.44 | 0.081  |
|                 | <i>SERPINE1</i> | 1.41 | 0.09 | 0.340 | 2.57  | 0.97 | 1.000  | 5.07  | 0.69 | <0.001 |
|                 | <i>DSC2</i>     | 1.47 | 0.24 | 0.792 | 0.80  | 0.16 | 0.890  | 2.60  | 0.30 | 0.035  |
|                 | <i>DNMT1</i>    | 0.90 | 0.07 | 0.733 | 0.54  | 0.03 | <0.001 | 0.47  | 0.01 | <0.001 |
|                 | <i>DNMT3A</i>   | 0.91 | 0.03 | 0.722 | 0.63  | 0.08 | 0.064  | 0.77  | 0.02 | 0.050  |
|                 | <i>DNMT3B</i>   | 0.90 | 0.04 | 0.978 | 0.58  | 0.04 | 0.001  | 0.48  | 0.01 | <0.001 |
|                 | <i>TET1</i>     | 1.32 | 0.14 | 0.442 | 1.01  | 0.06 | 1.000  | 1.32  | 0.13 | 0.258  |

# Unexpressed in Controls (DMEM under normoxic conditions); CM, conditioned media in normoxia; HY, DMEM in hypoxia; CM+HY, CM in hypoxia

**Table S5.** DNA methylation and gene expression changes after DAC treatment

| Condition  |                | DNA methylation |      |       |      | Gene expression |                    |       |         |
|------------|----------------|-----------------|------|-------|------|-----------------|--------------------|-------|---------|
|            |                | Control         |      | DAC   |      | P-value         | DAC                |       |         |
| Cell line  | Gene           | %               | SEM  | %     | SEM  |                 | FC                 | SEM   | p-value |
| BxPC-3     | <i>TWIST1</i>  | 77.43           | 0.53 | 57.66 | 1.83 | <0.001          | 99.2 <sup>#</sup>  |       |         |
|            | <i>CDH1</i>    | na              |      | na    |      |                 | 1.79               | 0.27  | 0.042   |
|            | <i>KRT19</i>   | na              |      | na    |      |                 | 0.48               | 0.05  | 0.001   |
|            | <i>OCN</i>     | na              |      | na    |      |                 | 4.43               | 0.22  | <0.001  |
|            | <i>STEAP1</i>  | 53.33           | 5.17 | 49.88 | 4.27 | 0.38            | 1.14               | 0.11  | 0.339   |
|            | <i>TSPAN13</i> | na              |      | na    |      |                 | 1.85               | 0.1   | <0.001  |
|            | <i>CDH2</i>    | 88.49           | 3.43 | 67.85 | 3.90 | 0.002           | 4.79               | 0.41  | 0.004   |
|            | <i>FN1</i>     | 7.57            | 2.02 | 9.47  | 3.01 | 0.494           | 4.55               | 0.14  | <0.001  |
|            | <i>ITGA5</i>   | na              |      | na    |      |                 | 3.42               | 0.12  | 0.008   |
|            | <i>BMP2</i>    | 4.44            | 1.26 | 4.55  | 1.35 | 1.000           | 3.98               | 0.37  | 0.003   |
|            | <i>NID2</i>    | 93.51           | 0.40 | 68.38 | 3.42 | <0.001          | 0.87               | 0.04  | 0.019   |
|            | <i>DSC2</i>    | 4.63            | 0.90 | 4.57  | 1.11 | 0.949           | 5.46               | 0.19  | 0.002   |
| MIA PaCa-2 | <i>TWIST1</i>  | 95.48           | 1.85 | 44.52 | 5.38 | <0.001          | 15.4 <sup>#</sup>  |       |         |
|            | <i>CDH1</i>    | na              |      | na    |      |                 | 68.5 <sup>#</sup>  |       |         |
|            | <i>KRT19</i>   | na              |      | na    |      |                 | 9.34               | 0.31  | <0.001  |
|            | <i>OCN</i>     | na              |      | na    |      |                 | 1.56               | 0.11  | 0.005   |
|            | <i>STEAP1</i>  | 81.04           | 1.01 | 50.67 | 2.47 | 0.001           | 45.3 <sup>#</sup>  |       |         |
|            | <i>TSPAN13</i> | na              |      | na    |      |                 | 7.97               | 0.16  | <0.001  |
|            | <i>CDH2</i>    | 97.57           | 0.29 | 49.42 | 0.79 | <0.001          | 356.5 <sup>#</sup> |       |         |
|            | <i>FN1</i>     | 83.09           | 4.58 | 54.17 | 1.39 | <0.001          | 5.69               | 0.3   | <0.001  |
|            | <i>ITGA5</i>   | na              |      | na    |      |                 | 2.46               | 0.12  | 0.004   |
|            | <i>BMP2</i>    | 83.27           | 5.02 | 61.20 | 3.93 | 0.007           | 656. <sup>#</sup>  |       |         |
|            | <i>NID2</i>    | 92.23           | 1.80 | 39.72 | 1.88 | <0.001          | 631.4 <sup>#</sup> |       |         |
|            | <i>DSC2</i>    | 81.42           | 2.56 | 50.58 | 4.89 | 0.002           | 148.9 <sup>#</sup> |       |         |
| PANC-1     | <i>TWIST1</i>  | 95.39           | 2.13 | 42.34 | 3.39 | <0.001          | 17.8 <sup>#</sup>  |       |         |
|            | <i>CDH1</i>    | na              |      | na    |      |                 | 106.4 <sup>#</sup> |       |         |
|            | <i>KRT19</i>   | na              |      | na    |      |                 | 1.39               | 0.08  | 0.003   |
|            | <i>OCN</i>     | na              |      | na    |      |                 | 1.66               | 0.07  | 0.001   |
|            | <i>STEAP1</i>  | 50.29           | 3.70 | 39.49 | 1.83 | 0.144           | 15.1 <sup>#</sup>  |       |         |
|            | <i>TSPAN13</i> | na              |      | na    |      |                 | 2.36               | 0.23  | <0.001  |
|            | <i>CDH2</i>    | 94.95           | 0.26 | 48.55 | 5.39 | <0.001          | 282.1 <sup>#</sup> |       |         |
|            | <i>FN1</i>     | 86.50           | 0.63 | 50.73 | 5.90 | <0.001          | 1.94               | 0.02  | 0.006   |
|            | <i>ITGA5</i>   | na              |      | na    |      |                 | 1.37               | 0.16  | 0.075   |
|            | <i>BMP2</i>    | 79.24           | 2.83 | 66.02 | 2.03 | 0.114           | 749.4 <sup>#</sup> |       |         |
|            | <i>NID2</i>    | 87.42           | 0.04 | 45.13 | 6.61 | <0.001          | 174.8 <sup>#</sup> |       |         |
|            | <i>DSC2</i>    | 36.27           | 3.33 | 30.71 | 2.49 | 0.040           | 46.85              | 11.15 | <0.001  |
| SU.86.86   | <i>TWIST1</i>  | 95.07           | 2.99 | 74.15 | 3.69 | <0.001          | 332.8 <sup>#</sup> |       |         |
|            | <i>CDH1</i>    | na              |      | na    |      |                 | 1.52               | 0.13  | 0.004   |
|            | <i>KRT19</i>   | na              |      | na    |      |                 | 0.59               | 0.04  | <0.001  |
|            | <i>OCN</i>     | na              |      | na    |      |                 | 2.32               | 0.21  | 0.002   |
|            | <i>STEAP1</i>  | 59.15           | 0.85 | 57.75 | 0.19 | 0.723           | 1.13               | 0.08  | 0.390   |
|            | <i>TSPAN13</i> | na              |      | na    |      |                 | 0.79               | 0.04  | 0.043   |
|            | <i>CDH2</i>    | 4.08            | 0.92 | 4.30  | 1.35 | 0.886           | 2.42               | 0.16  | <0.001  |

|              |       |      |       |      |       |       |      |        |
|--------------|-------|------|-------|------|-------|-------|------|--------|
| <i>FN1</i>   | 6.80  | 1.51 | 5.93  | 0.29 | 0.717 | 10.23 | 0.69 | 0.029  |
| <i>ITGA5</i> | na    |      | na    |      |       | 3.97  | 0.2  | <0.001 |
| <i>BMP2</i>  | 3.50  | 0.02 | 4.54  | 1.58 | 0.478 | 2.93  | 0.21 | 0.016  |
| <i>NID2</i>  | 36.55 | 2.07 | 35.69 | 4.11 | 0.715 | 6.5   | 0.39 | <0.001 |
| <i>DSC2</i>  | 5.12  | 1.42 | 6.38  | 2.63 | 0.442 | 2.65  | 0.18 | 0.002  |

---

na, not analyzed; # Unexpressed in Controls, Fold Change calculated based on ct = 40
